# Supplementary material for: A chromosome-level genome assembly of Cydia pomonella provides insights into chemical ecology and insecticide resistance
Source: PubMed Central journal article supplement (PMC6748993; doi:10.1038/s41467-019-12175-9), 2019-09-17
Supplement: 41467_2019_12175_MOESM4_ESM.pdf [file 41467_2019_12175_MOESM4_ESM.pdf]

## **Description of Additional Supplementary Files**

File Name: Supplementary Data 1

Description: The chromosome positions of 667 genes that putatively associated with chemical insecticide resistance.
